# Supplementary material
Source: publisher figshare collection journal article supplement (https://acs.figshare.com/ndownloader/files/4580434)
Supplement: Supplementary file 1 [file 4580434]

# Correlation between bonding geometry and band gap states at organic-inorganic interfaces: catechol on rutile TiO<sub>2</sub> (110)

Shao-Chun Li<sup>1</sup>, Jian-guo Wang<sup>2</sup>, Peter Jacobson<sup>1</sup>, X. -Q. Gong<sup>2</sup>, Annabella Selloni<sup>2,\*</sup>, Ulrike Diebold<sup>1,\*</sup>

<sup>1</sup>*Department of Physics, Tulane University, New Orleans, LA 70118 (USA)*

<sup>2</sup>*Department of Chemistry, Princeton University Princeton, NJ 08544 (USA)*

E-mail: aselloni@princeton.edu, diebold@tulane.edu

## Supplemental Computational Results:

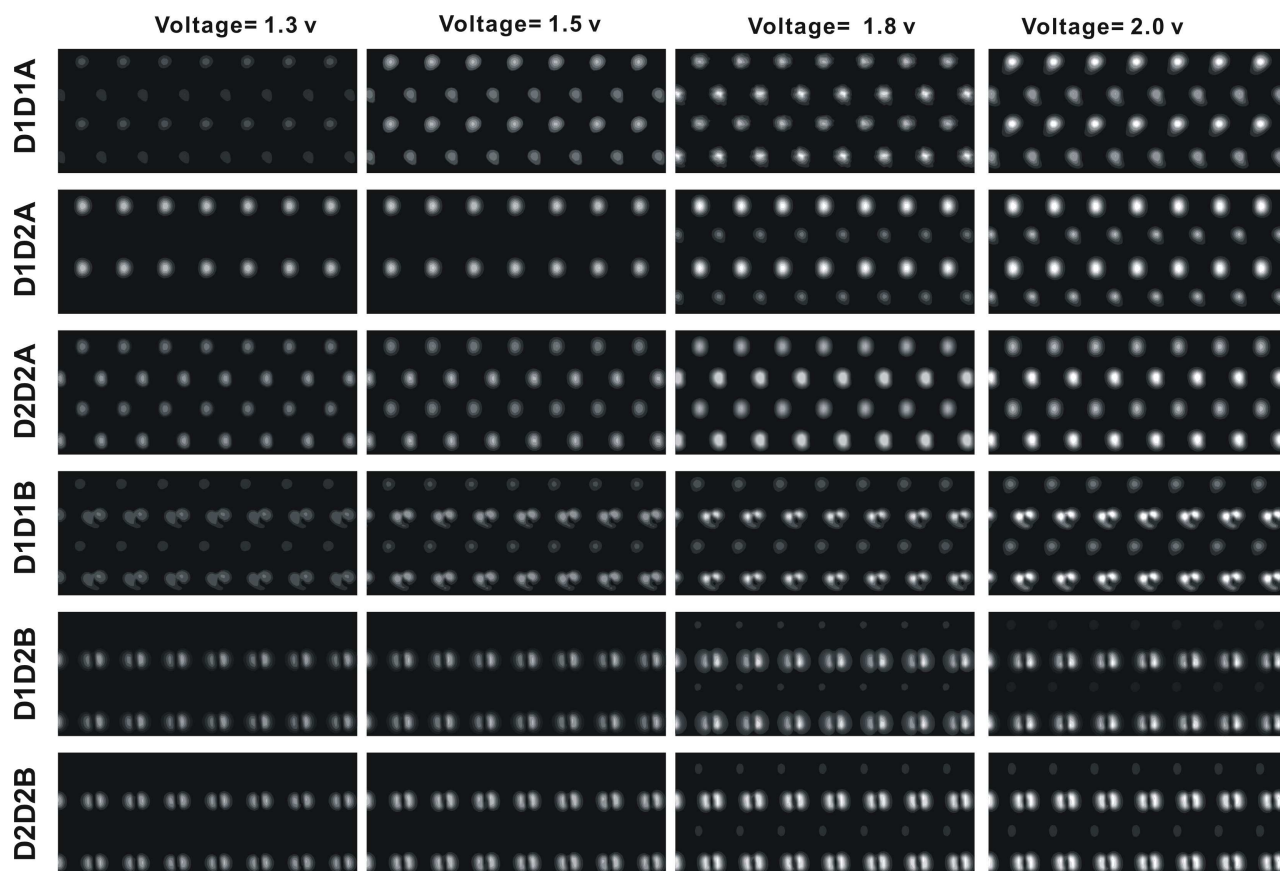

**Figure S1:** Simulated empty state STM images as a function of bias ( $V=1.3, 1.5, 1.8$  and  $2.0$  eV) for the structures in Fig.2. The same contrast scale is used for all the images. Bias voltages are referenced to the Fermi level,  $E_F$ . Note that, while  $E_F$  is located in the vicinity of the conduction band minimum in slightly-reduced TiO<sub>2</sub> samples, it is located at the valence band maximum in the theoretical calculations.

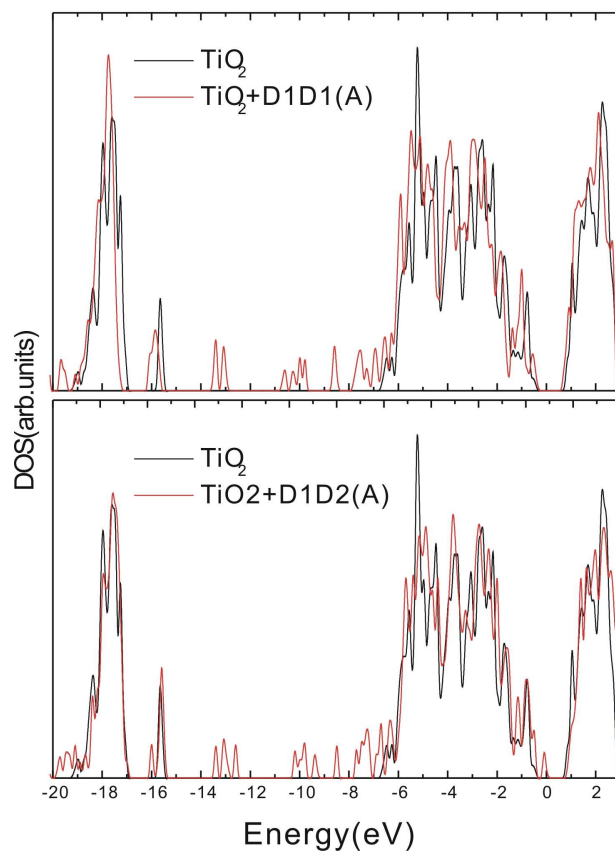

**Figure S2.** Total DOS of a  $4 \times 1$  overlayer of catechol/ $\text{TiO}_2$  (110) in D1\_D1(A) and D1\_D2(A) configuration. States well below the O-2p valence band are shown. The DOS for the clean surface is also reported (black curve).
